# Supplementary material
Source: PubMed Central journal article supplement (PMC10062442)
Supplement: NIHMS1875360-supplement-Supporting_Information.pdf [file NIHMS1875360-supplement-Supporting_Information.pdf]

**Supporting Table 1. Oligonucleotides used in this study.**

| Name                                            | Sequence (5'-3')              |
|-------------------------------------------------|-------------------------------|
| <i>For gene expression analysis by qRT-PCR</i>  |                               |
| mouse GAPDH -F                                  | AGGTCGGTGTGAACGGATTTG         |
| mouse GAPDH -R                                  | TGTAGACCATGTAGTTGAGGTCA       |
| mouse IL-25-F                                   | ACAGGGACTTGAATCGGGTC          |
| mouse IL-25-R                                   | TGGTAAAGTGGGACGGAGTTG         |
| mouse IL-1 $\beta$ -F                           | GAAATGCCACCTTTTGACAGTG        |
| mouse IL-1 $\beta$ -R                           | TGGATGCTCTCATCAGGACAG         |
| mouse IL-5-F                                    | GCAATGAGACGATGAGGCTTC         |
| mouse IL-5-R                                    | GCCCCTGAAAGATTTCTCCAATG       |
| mouse IL-6-F                                    | CTGCAAGAGACTTCCATCCAG         |
| mouse IL-6-R                                    | AGTGGTATAGACAGGTCTGTTGG       |
| mouse TNF $\alpha$ -F                           | CAGGCGGTGCCTATGTCTC           |
| mouse TNF $\alpha$ -R                           | CGATCACCCCGAAGTTCAGTAG        |
| human GAPDH-F                                   | GGAGCGAGATCCCTCCAAAAT         |
| human GAPDH-R                                   | GGCTGTTGTCATACTTCTCATGG       |
| human TSLP-F                                    | ATGTTTCGCCATGAAAATAAGGC       |
| human TSLP-R                                    | GCGACGCCACAATCCTTGTA          |
| human Eotaxin-F                                 | ACACCTTCAGCCTCCAACAT          |
| human Eotaxin-R                                 | GGTCTTGAAGATCACAGCTT          |
| human IL-8-F                                    | ACTGAGAGTGATTGAGAGTGAGAC      |
| human IL-8-R                                    | AACCCTCTGCACCCAGTTTTC         |
| human IL-33-F                                   | TCAGGTGACGGTGTTGATGG          |
| human IL-33-R                                   | GGAGCTCCACAGAGTGTTCC          |
| human IL-6-F                                    | ACTCACCTCTTCAGAACGAATTG       |
| human IL-6-R                                    | CCATCTTTGGAAGGTTCAAGTTG       |
| human TNF $\alpha$ -F                           | CCTCTCTCTAATCAGCCCTCTG        |
| human TNF $\alpha$ -R                           | GAGGACCTGGGAGTAGATGAG         |
| <i>For bacterial abundance analysis by qPCR</i> |                               |
| 16s-F                                           | CGTCAGCTCGTGYCGTGAG           |
| 16s-R                                           | CGTCRTCCCCRCCTTCC             |
| 16s-probe                                       | TTAAGTCCCRYAACGAGCGCAACCC     |
| tpi-F                                           | CATCTGATAAACCTTCGACAGCTTT     |
| tpi-R                                           | TGCTATCTTCAATCACGGTATGACA     |
| tpi-probe                                       | CCAGCTTCACGTTCTTCATCAGATTCACC |
| gtf-F                                           | CACGCCATGCTGGAAGTG            |
| gtf-R                                           | GCGATGAGCCAAGCTGAAG           |
| gtf-probe                                       | TTAGCTGCTGCGTAGACTTCGTCT      |
| <i>For construction of MUC5AC deletion</i>      |                               |
| sgRNA-1                                         | GCACCTTTTTTCATGCACCACTGG      |
| sgRNA-2                                         | CAGAACGTGGAGGGCATATCAGG       |
| sgRNA-3                                         | CAATAACCACCCGTGAGTCTGGG       |
| sgRNA-4                                         | AGTCTGGGGCAGTATTGGATGGG       |
| <i>For analysis of MUC5AC deletion</i>          |                               |
| oGN383                                          | GGGAGTCGACTTCTGCTGAC          |
| oGN384                                          | ATCCTTTGCCCCATTTTACC          |
| oGN385                                          | GATGGACAGGTCTTCTACTTCCC       |
| oGN386                                          | AGTGGTGGTATTAGACTCCTGGA       |

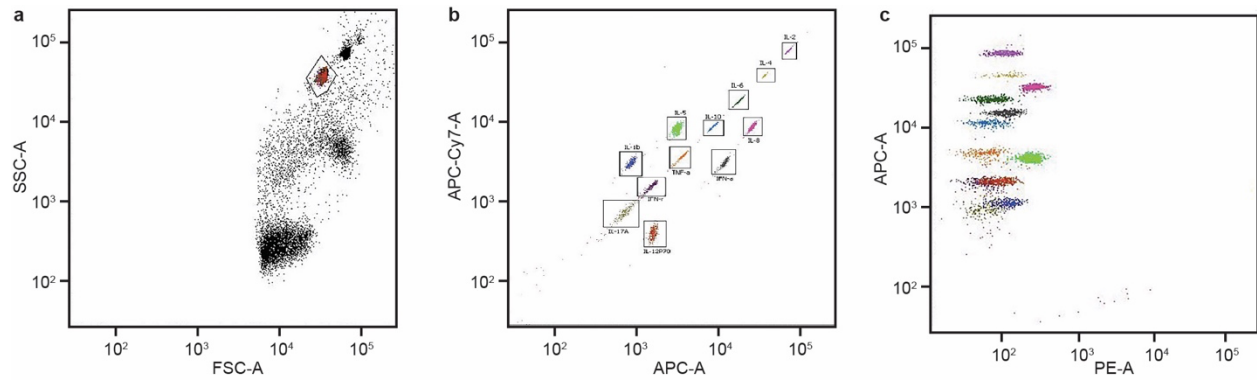

**Supporting Fig. 1. FACS gating strategy for cytokine measurement.** The assay uses antibody-coated beads to capture analytes efficiently. Each bead has a unique fluorescence intensity that resolves as a unique population by Allophycocyanin (APC) and APC-CY7 on a flow cytometer. Analyte bound to a bead is detected by a second antibody with a phycoerythrin (PE) label. The PE signal is proportional to the amount of bound analyte. According to the kit instructions, we first adjusted the voltage of forward scatter (FSC) and side scatter (SSC) until the singlet bead populations fitted well. Singlet bead populations were gated by SSC-A versus FSC-A to exclude cell debris and platelets (**a**). A total of 3600 beads with around 300 in each cluster were analyzed. Different antibody-labeled bead populations were identified by APC and APC-CY7 according to their fluorescence intensities (**b**). Some serially diluted standards with known concentration were also analyzed to generate a standard curve for each analyte. After acquiring samples on a flow cytometer (**c**), the FCS files were analyzed by FCAP Array™ 3.0 software which identifies each bead population, generates a standard curve, and calculates the concentration of unknown samples.
